# Motor planning brings human primary somatosensory cortex into movement-specific preparatory states

Giacomo Ariani<sup>1,2,\*</sup>, J. Andrew Pruszynski<sup>1,4,5,6</sup>, Jörn Diedrichsen<sup>1,2,3</sup>

<sup>1</sup>The Brain and Mind Institute, <sup>2</sup>Department of Computer Science, <sup>3</sup>Department of Statistical and Actuarial Sciences, <sup>4</sup>Department of Physiology and Pharmacology, <sup>5</sup>Department of Psychology, <sup>6</sup>Robarts Research Institute, Western University, London, ON N6A3K7, Canada.

\*Correspondence should be addressed to Giacomo Ariani at [gariani@uwo.ca](mailto:gariani@uwo.ca), Western Interdisciplinary Research Building, London, ON N6A 3K7, Canada.

**Running title.** Motor planning in human sensorimotor cortex.

**Word count.** Abstract: 220; Significance statement: 117; Introduction: 432; Results: 1399; Discussion: 910. 28 pages, 4 figures, 0 tables, 1 supplementary figure.

**Author contributions.** G.A. and J.D. designed research; G.A. performed research; G.A. analyzed data; G.A. drafted the manuscript; G.A., J.A.P, and J.D. edited the manuscript.

**Acknowledgements.** This work was supported by a NSERC Discovery Grant (RGPIN-2016-04890) awarded to J.D., and the Canada First Research Excellence Fund (BrainsCAN). The authors wish to thank Eva Berlot for helpful discussions and contributions to data analysis.

**Disclosures.** The authors declare no conflicts of interest.

## 1 **Abstract**

2 Motor planning plays a critical role in producing fast and accurate movement. Yet, the neural  
3 processes that occur in human primary motor and somatosensory cortex during planning,  
4 and how they relate to those during movement execution, remain poorly understood. Here  
5 we used 7T functional magnetic resonance imaging (fMRI) and a delayed movement  
6 paradigm to study single finger movement planning and execution. The inclusion of no-go  
7 trials and variable delays allowed us to separate what are typically overlapping planning and  
8 execution brain responses. Although our univariate results show widespread deactivation  
9 during finger planning, multivariate pattern analysis revealed finger-specific activity patterns  
10 in contralateral primary somatosensory cortex (S1), which predicted the planned finger  
11 movements. Surprisingly, these activity patterns were similarly strong to those found in  
12 contralateral primary motor cortex (M1). Control analyses ruled out the possibility that the  
13 detected information was an artifact of subthreshold movements during the preparatory  
14 delay. Furthermore, we observed that finger-specific activity patterns during planning were  
15 highly correlated to those during movement execution. These findings reveal that motor  
16 planning activates the specific S1 and M1 circuits that are engaged during the execution of  
17 a finger movement – while activity in S1 and M1 is overall suppressed. We propose that  
18 preparatory states in S1 may improve movement control through changes in sensory  
19 processing or via direct influence of spinal motor neurons.

20

## 21 **Key words**

22 Motor planning; Sensorimotor cortex; Finger control; fMRI; Representational geometry.

23

## 24 **Significance statement**

25 Motor planning is important for good motor performance, yet it is unclear which neural  
26 processes underlie the preparation of the nervous system for an upcoming movement. Using  
27 high-resolution functional neuroimaging, we investigated how the planning of finger  
28 movements changes the activity state in primary motor (M1) and somatosensory (S1) cortex,  
29 and how brain responses during planning and execution relate to each other. We show that  
30 planning leads to finger-specific activation in both M1 and S1, which is highly similar to the  
31 finger-specific activity patterns elicited during movement execution. Our findings suggest  
32 that even S1 is being specifically prepared for an upcoming movement, either to actively  
33 contribute to the outflowing motor command or to enable movement-specific sensory gating.  
34

## 35 Introduction

36 Animals are capable of generating a wide variety of dexterous behaviors accurately and  
37 effortlessly on a daily basis. This remarkable ability relies on the motor system reaching the  
38 appropriate preparatory state before each movement is initiated. At the level of behavior, the  
39 process of motor programming, or planning, has long been shown to be beneficial to  
40 performance (1–3), leading to faster reaction times (4–6) and more accurate response  
41 selection (7–10). The behavioral study of motor planning has spurred the neurophysiological  
42 investigation of what movement parameters are specified in the neuronal firing of a number  
43 of cortical regions including the dorsal premotor cortex, PMd (11–13), the supplementary  
44 motor area, SMA (14), and the posterior parietal cortex, PPC (15–17). Building on this work,  
45 human neuroimaging studies have shown that activity in parieto-frontal brain regions during  
46 planning of prehension movements can be used to decode several movement properties  
47 such as grip type (18, 19), action order (20), and effector (21–24). At the level of neural  
48 population dynamics (25), motor planning can be understood as bringing the neuronal state  
49 towards an ideal preparatory point. Once this state is reached and the execution is triggered,  
50 the intrinsic dynamics of the system then let the movement unfold (26, 27). While the neuronal  
51 correlates of movement planning have largely been studied in non-human primates using  
52 upper limb movements, such as reaching and grasping, motor planning also plays a crucial  
53 role in fine hand control (7).

54 Despite their importance for everyday dexterous behaviors such as typing, writing, or  
55 tying a knot, finger movements have not been closely investigated at the single neuron level.  
56 In humans, previous fMRI studies of finger movements have not separated planning from  
57 execution (28–35). Therefore, we have an incomplete picture of how motor planning readies  
58 the human sensorimotor system for the production of individuated finger movements. Based  
59 on previous work in reaching, we expected that the primary motor cortex (M1) should  
60 represent movements during both planning and execution (36–38). What is unclear, however,  
61 is whether the primary somatosensory cortex (S1) also receives information about the  
62 planned movement before movement onset. Furthermore, we currently do not know how  
63 brain representations of planned finger movements relate to those during movement  
64 execution. To address these gaps, we designed a high-field (7T) fMRI experiment to study  
65 what brain regions underlie the planning of individual finger movements. We used no-go trials

66 and variable delays to temporally separate the evoked responses to movement planning and  
 67 execution, and advanced multivariate pattern analyses to examine the correspondence  
 68 between fMRI correlates of planned and executed finger movements.

69

## 70 Results

### 71 *Deactivation in sensorimotor regions during planning of finger movements*

72 We instructed 22 participants to plan and execute repeated keypresses with individual  
 73 fingers of their right hand on a keyboard device while being scanned with 7T fMRI. The key  
 74 to be pressed corresponded to one of three fingers (thumb, middle, and little) and was cued  
 75 during the preparation phase by numbers on the screen (1=thumb, 3=middle, 5=little, e.g.,  
 76 Fig. 1A).

77

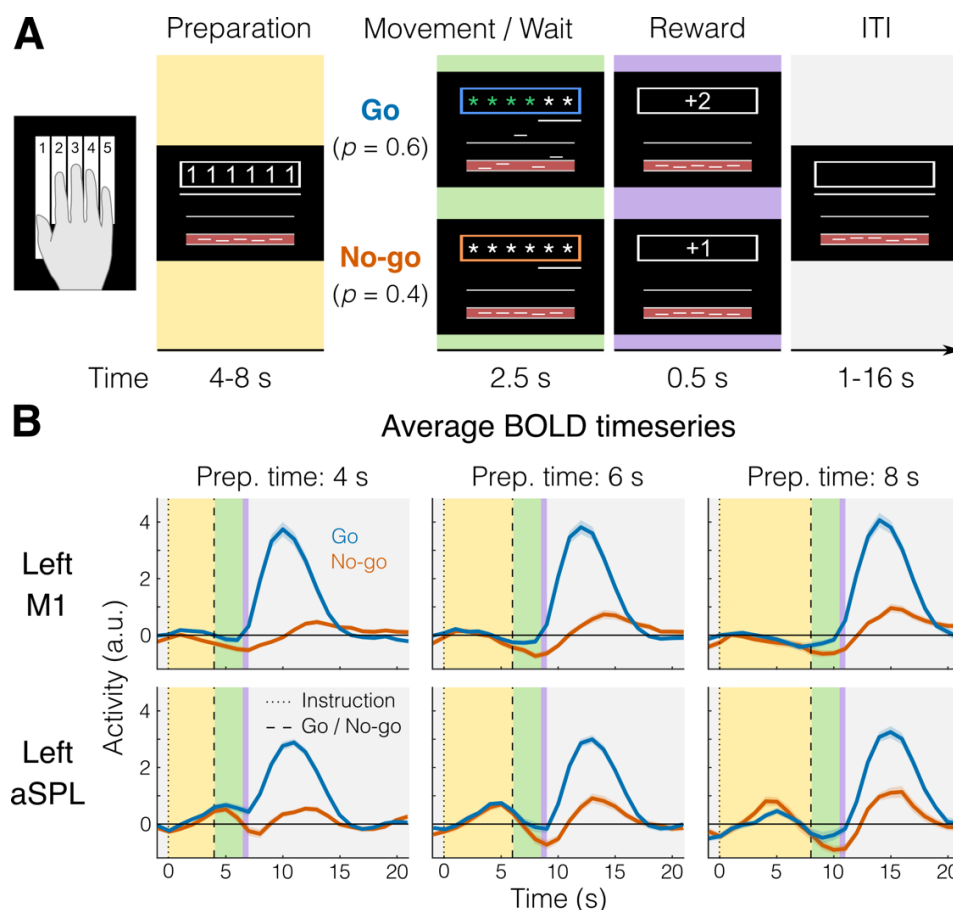

**Figure 1 | fMRI task and BOLD responses.** **A.** Example trial with timing information. Background colors indicate different experimental phases (yellow = preparation; green = movement (go) or wait (no-go); purple = reward; gray = inter-trial interval, ITI). **B.** Group-averaged BOLD response ( $N = 22$ ) for go (blue) and no-go (orange) trials in a region that shows no planning evoked activity (Left M1, top), and one that shows some planning evoked activity (Left aSPL, bottom). Shaded areas indicate standard error of the mean (SEM). Background colors correspond to trial phases as in A.

78

79 After a variable delay (4–8 seconds), participants received a color cue indicating whether to  
80 press the planned finger (go trials), or whether to withhold the response (no-go trials). Upon  
81 the go cue, participants had to initiate the correct response as fast as possible and make 6  
82 presses of the designated finger, before receiving accuracy points for reward (see Methods).  
83 To control for involuntary overt movements during the preparation phase, we required  
84 participants to maintain a steady force on all of the keys during the delay, which was closely  
85 monitored online. To ensure that planning results would not be biased by the subsequent  
86 execution, we restricted all our analyses to no-go trials without a subsequent movement (see  
87 Methods). First, we asked which brain regions showed an evoked response during the  
88 planning of finger movements (e.g., Fig. 1B). We focused our analysis on the lateral aspect  
89 of the contralateral (left) hemisphere (purple and white areas of the Fig. 2 inset) which  
90 included premotor, primary motor, primary somatosensory, and anterior parietal cortical  
91 regions. To examine brain activation during finger planning, we performed a univariate  
92 contrast of the preparation phase (across the three fingers) versus the resting baseline (Fig.  
93 2A). Overall, the instruction stimulus evoked little to no activation in our regions of interest  
94 (ROIs, Fig. 2A). In fact, compared to resting baseline, we observed significant deactivation  
95 (Fig. 2E) in dorsal premotor cortex (PMd,  $t_{21} = -2.642$ ,  $p = 0.015$ ), primary motor cortex (M1,  
96  $t_{21} = -7.592$ ,  $p = 1.887e-07$ ), and primary somatosensory cortex (S1,  $t_{21} = -6.618$ ,  $p = 1.491e-$   
97  $06$ ). In comparison, movement execution strongly activated M1 and S1 (Fig. 2C), with  
98 activation being significant in all our ROIs (Fig. 2E, all  $t_{21} > 14.469$ , all  $p < 2.153e-12$ ).

99

### 100 *Planning induces informative patterns in primary motor and somatosensory cortex*

101 Although we found little univariate activation in our main ROIs, preparatory processes need  
102 not increase the overall activation in a region. Rather, the region could converge to a specific  
103 preparatory neural state (26), while activity increments and decrements within the region (i.e.,  
104 at a finer spatial scale) average each other out. In this case, information about planned  
105 movements would be present in the multivoxel activity patterns in that region. To test this  
106 idea, we calculated the crossnobis dissimilarity (see Methods) between activity patterns.  
107 Systematically positive values of this dissimilarity measure indicate that the patterns reliably  
108 differentiate between the different planned actions (39, 40). Indeed, a surface-based  
109 searchlight approach (41) revealed reliably positive crossnobis dissimilarity between the

110 activity patterns related to planning of individual finger movements (Fig. 2B) in both M1 ( $t_{21} =$   
 111 2.734,  $p = 0.012$ ) and S1 ( $t_{21} = 2.987$ ,  $p = 0.007$ , Fig. 2F).  
 112

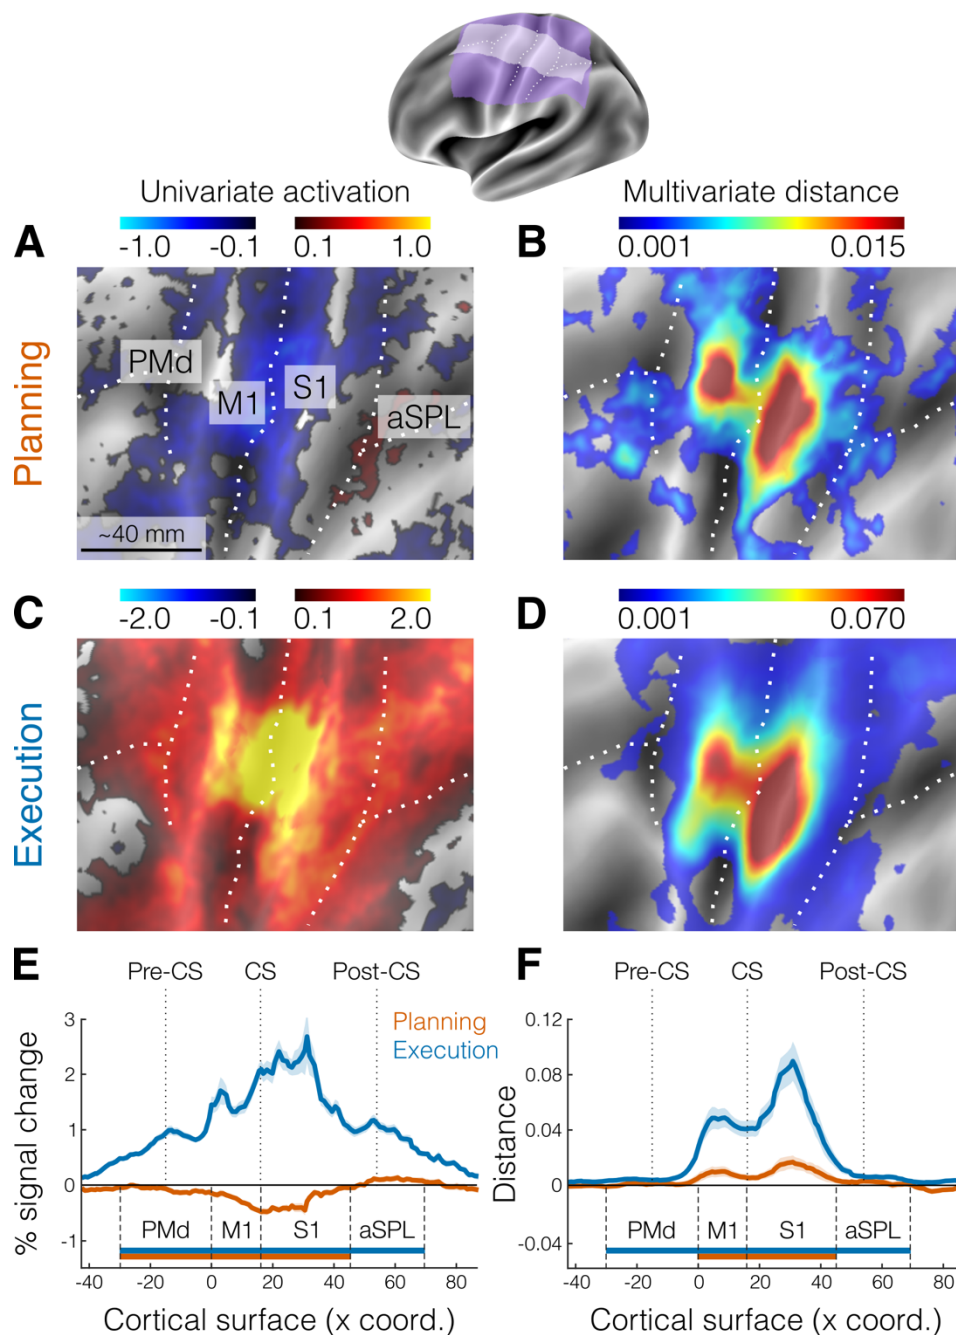

**Figure 2 | Activation and distance analyses of movement planning and execution.** The inset shows the inflated cortical surface of the contralateral (left) hemisphere, highlighting the area of interest (purple) and the strip used for cross-section analysis (white). Major sulci are indicated by white dotted lines. **A**. Univariate activation map (percent signal change) for the contrast planning > baseline (no-go trials only). **B**. Multivariate searchlight map of the mean crossnobis distance between the planning of the three fingers (no-go trials only). **C**. Same as A, but for the univariate contrast execution > baseline. **D**. Same as B, but for the mean crossnobis distance between fingers during movement execution. **E**. Cross-section analysis of the mean percent signal change ( $\pm$  SEM) during planning (orange) and execution (blue). Horizontal bars indicate significance ( $p < 0.05$ ) in a 2-sided one-sample  $t$ -test vs zero for

selected ROIs. F. Same as E, but for the mean crossnobis distance ( $\pm$  SEM). Pre-CS = precentral sulcus; CS = central sulcus; Post-CS = postcentral sulcus; PMd = dorsal premotor cortex; M1 = primary motor cortex; S1 = primary somatosensory cortex; aSPL = anterior superior parietal lobule.

113

114 Surprisingly, the distribution of these informative patterns was highly similar to the distribution  
115 of information during movement execution (Fig. 2D). Visual inspection suggested that the  
116 informative patterns during planning may be concentrated more dorsally in M1 and S1  
117 relative to execution. However, a Hotelling  $T^2$  test revealed no systematic difference in the  
118 location of the peak vertex between planning and execution across subjects (M1:  $T^2_{2,20} =$   
119  $0.725$ ,  $p = 0.712$ ; S1:  $T^2_{2,20} = 2.424$ ,  $p = 0.335$ ). Thus, our results show that information about  
120 single finger movements is already represented during motor planning in the same parts of  
121 the primary motor and somatosensory cortices that are engaged during execution of the  
122 movements. Given that we only used the activity estimates from no-go trials (~40% of total  
123 trials), this information cannot be explained by a spill-over from subsequent execution-related  
124 activity. An analysis using the estimates of planning activity from all trials yielded very similar  
125 results (see Fig. S1), demonstrating that we could separate planning from execution-related  
126 signals.

127

### 128 *Activity patterns are not caused by small movements during the preparation phase*

129 The presence of planning-related information in primary sensorimotor regions was surprising,  
130 especially in S1, where it had not previously been reported in comparable fMRI studies (18,  
131 20). To ensure that these results were not caused by overt movement, participants were  
132 instructed to maintain a steady force on the keyboard during the preparation phase, such  
133 that we could monitor even the smallest involuntary preparatory movements. Inspection of  
134 the average force profiles (Fig. 3A) revealed that participants were successful in maintaining  
135 a stable force between 0.2 and 0.4 N during preparation. However, averaging forces across  
136 trials may obscure small, idiosyncratic patterns visible during individual trials (Fig. 3B) that  
137 could be used to distinguish the different movements. To test for the presence of such  
138 patterns, we submitted both the mean and standard deviation of the force traces on each  
139 finger to a multivariate dissimilarity analysis (see Methods).

140



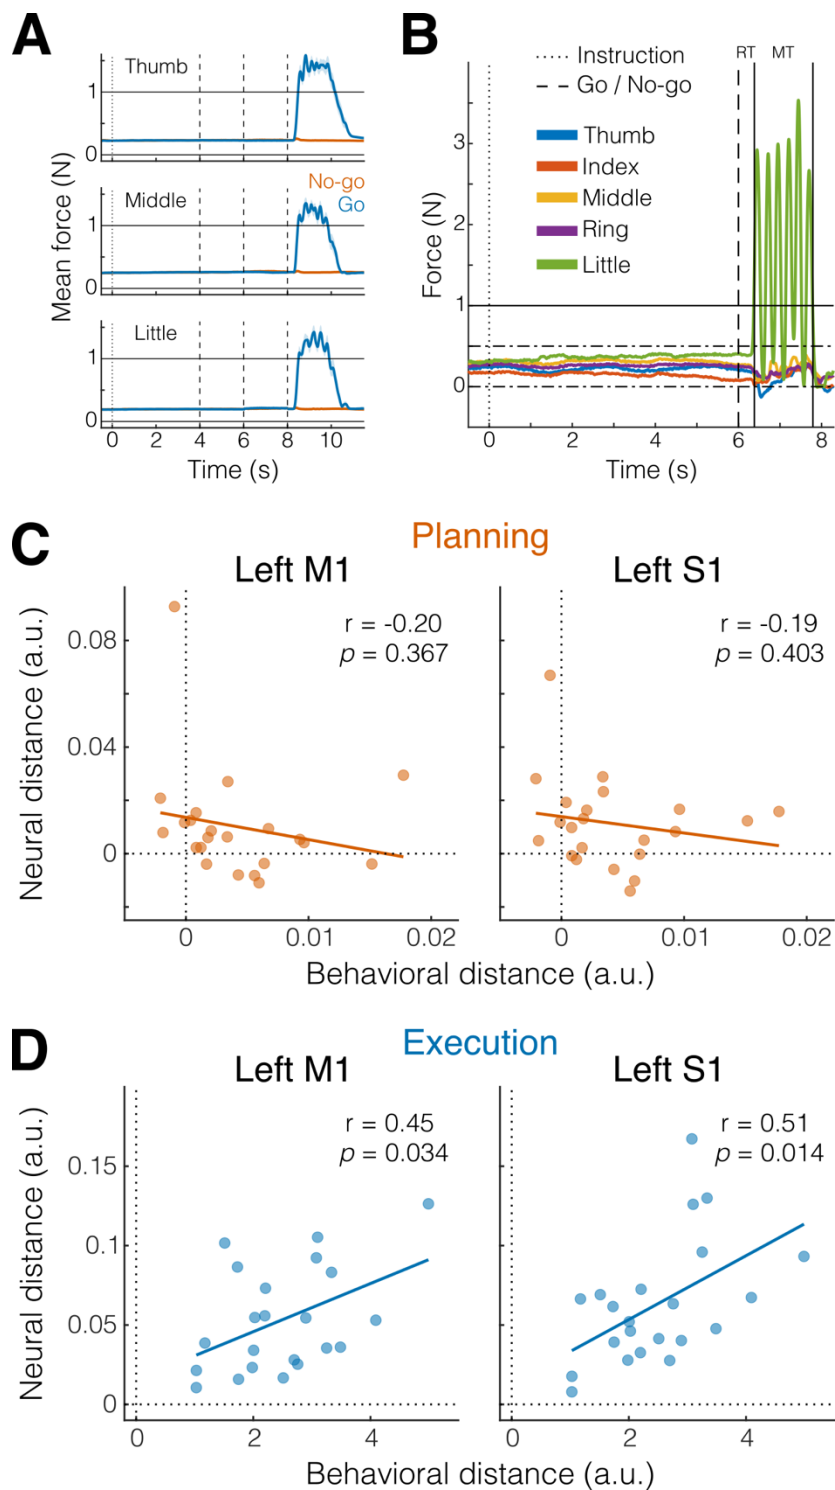

**Figure 3 | Small involuntary movements do not explain preparatory activity patterns in M1 and S1.** **A.** Mean finger force ( $\pm$  SEM) plotted in 10 ms bins, time-aligned to instruction onset (dotted vertical line) and end of the preparation phase (dashed vertical lines), separately for the three fingers and go (blue) and no-go (orange) trials. **B.** Example of an individual trial with a 6 s preparation phase, followed six presses of the little finger (green). Horizontal solid line denotes press threshold (1 N). Dash-dotted lines denote the boundaries of the finger pre-activation red area in Fig. 1A (see Methods). RT = reaction time; MT = movement time. **C.** Pearson's correlation ( $r$ ) between behavioral and neural distances in M1 and S1 (see Methods) during the preparation phase (planning, orange). Each dot represents an individual participant ( $N = 22$ ). Solid line shows linear regression,  $p$ -values refers to the slope of the line. **D.** Same as C, but during the movement phase (execution, blue).

141

142 Indeed, this sensitive analysis revealed that some participants showed small movement  
143 patterns predictive of the upcoming finger (Fig. 3C). These differences, however, were ~200-  
144 300 times smaller than the average differences during execution (Fig. 3D). More importantly,  
145 the magnitude of the behavioral differences for the preparation phase was uncorrelated to  
146 the amount of planning information present in sensory-motor regions (both  $p$ -values for the  
147 slope of the linear fit  $> 0.3$ ). Even after correcting for the influence behavioral patterns, the  
148 informative patterns in M1 and S1 remained significant, as shown by a significantly positive  
149 intercept in the linear fit in Fig. 3C (M1:  $p = 0.032$ ; S1:  $p = 0.007$ ). Thus, the finding of finger-  
150 specific activity patterns in M1 and S1 cannot be explained by small involuntary movements  
151 during the preparation phase.

152

### 153 *Single finger activity patterns from planning to execution are positively correlated*

154 How do planning-related activity patterns in M1 and S1 relate to the activity patterns observed  
155 during execution? Neurophysiological experiments have suggested that patterns of  
156 movement preparation are orthogonal – or uncorrelated – to the patterns underlying active  
157 movement (42). This arrangement allows movement preparation to occur without causing  
158 overt movement. When we compared the planning- and execution-related activity patterns  
159 as measured with fMRI, a technique that samples neuronal activity at a much coarser spatial  
160 resolution, we found the opposite result. Planning- and movement-related patterns for the  
161 same finger were tightly related. Inspection of the representational dissimilarity matrices  
162 (RDMs) for M1 and S1 (Fig. 4A), clearly shows that the biggest difference was between  
163 planning and execution patterns, which can also be seen in a 3D representation of the  
164 representational geometry (PC1 in Fig. 4B). Within each phase, the pattern for the thumb was  
165 more distinct than those for the other fingers, replicating previous results from execution  
166 alone (28, 29).

167

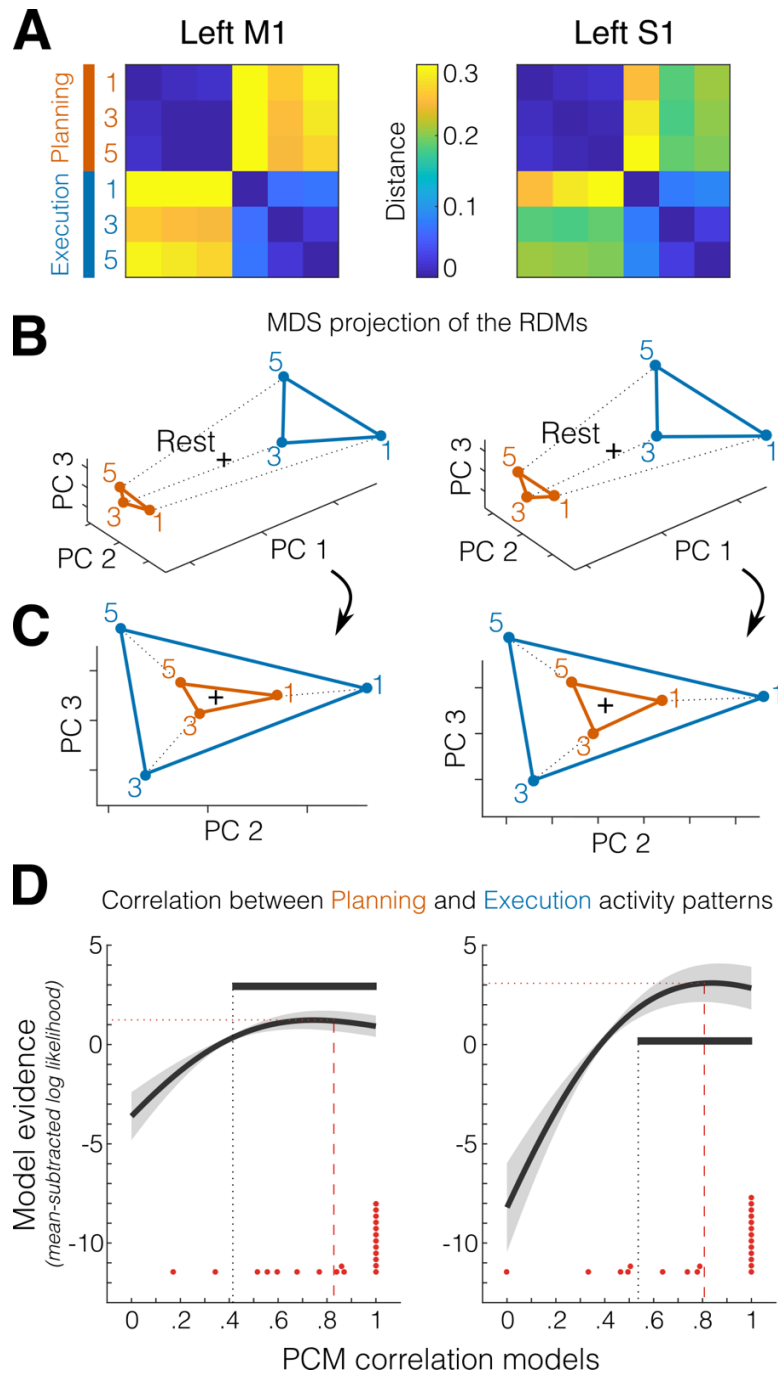

**Figure 4 | Correlated representations of single fingers across planning and execution. A.** Representational dissimilarity matrices (RDMs) of the activity patterns evoked by the three fingers during the preparation (no-go planning, orange) and movement (execution, blue) phases, separately for the two main ROIs (M1, left; S1, right). **B.** Multidimensional scaling (MDS) projection of the RDMs in A highlighting the first principal component (PC 1, difference between planning and execution). The black cross denotes resting baseline. **C.** Same as B, but rotated view to highlight the representational geometries for PC 2 and PC 3. **D.** Pattern component modelling (PCM) evaluation of models of different correlations between planning- and execution-related activity patterns (x-axis). Shown is the group-average of the individual log-likelihood ( $\pm$  SEM) curve expressed as a difference from the mean log-likelihood across models. Horizontal gray bars indicate models that perform statistically equivalently ( $p > 0.05$ ) to the best fitting model (determined in a cross-validated fashion, see Methods). Red dots indicate points of individually best fitting correlations ( $N = 22$ ). Red dashed lines denote the average winning models across participants. Dotted lines show the projections of horizontal bars and dashed lines on the respective axes.

168

169 Importantly, however, a rotated view of the representational geometry (Fig. 4C) showed that  
170 the finger patterns were arranged in a congruent way, with planning and execution related  
171 activity patterns for the same finger being closer to one another. To more precisely quantify  
172 the correspondence between planning and execution pattern for each finger, we used  
173 Pattern Component Modeling (PCM, 43) to evaluate the likelihood of the data, assuming a  
174 true correlation between 0 and 1. This approach automatically corrects for the biasing effect  
175 of measurement noise, which would lead to simple empirical pattern correlations to be lower  
176 than the true correlation. From the individual fits, we found that the average best correlation  
177 model was at 0.83 ( $\pm$  0.053 SEM) for M1 and at 0.81 ( $\pm$  0.061 SEM) for S1 (Fig. 4D, dashed  
178 lines). Using a cross-validated approach (see Methods), we compared the log-likelihoods to  
179 test whether the best fitting model was significantly better than any of the other correlation  
180 models. In both ROIs, the best fitting model was significantly better than the zero-correlation  
181 model (i.e., activity patterns across planning and execution totally uncorrelated, both  $p <$   
182 0.005), but not better than the one-correlation model (i.e., activity patterns are scaled version  
183 of each other, both  $p >$  0.1). By applying this method to every other model, we have evidence  
184 that the true (i.e., noiseless) correlation between planning and execution finger-specific  
185 activity pattern was between 0.41–1.0 in M1 and between 0.54–1.0 in S1 (Fig. 4D, horizontal  
186 bars). In sum, at the resolution of fMRI, the process of movement planning seems to induce  
187 a finger-specific pattern which very similar, and possibly identical, to the pattern activated  
188 during movement execution.

189

## 190 Discussion

191 In the present study, we asked participants to produce repeated single finger movements  
192 while undergoing 7T fMRI. We used a variable preparatory delay and no-go trials to cleanly  
193 dissociate the brain responses to the consecutive preparation and movement phases. We  
194 found that information about planned finger movements is present in both S1 and M1 before  
195 movement onset, even though the overall level of activation in these regions was below  
196 resting baseline. Moreover, while execution elicited much higher brain activation, the fine-  
197 grained, finger-specific activity patterns were highly similar across planning and execution.

198 Control analyses confirmed that the observed results were not caused by pre-movement  
199 finger activity.

200 Our finding that motor planning activates M1 in a finger-specific fashion was not  
201 necessarily surprising given many neurophysiological studies reporting anticipatory activity  
202 of M1 neurons related to movement intentions (37, 44, 45), as well as human neuroimaging  
203 showing shared information between delayed and immediate movement plans (36). In  
204 contrast, the robust activity patterns related to single finger planning in S1 were more  
205 surprising, given that this region is often considered to be mostly concerned with processing  
206 incoming sensory information from tactile and proprioceptive receptors arising after  
207 movement onset (18, 20–22). So, what could then be the role of S1 during movement  
208 planning?

209 First, it is worth noting that there are substantial projections from S1 (Brodmann area 3a)  
210 that terminate in the ventral horn of the cortico-spinal tract (46, 47). Although stimulation of  
211 area 3a in macaques typically fails to evoke overt movements (48), it has been suggested  
212 that this population of cortico-motoneurons specifically projects to gamma motoneurons that  
213 control the sensitivity of muscle spindle afferents (47). Thus, it is possible that S1 plays an  
214 active role in movement generation by preparing the spindle apparatus in advance of the  
215 movement.

216 Second, the finger-specific preparatory state in S1 may reflect the anticipation or  
217 prediction of the upcoming sensory stimulation, allowing for a movement-specific sensory  
218 gain control (49). Some sensory stimuli could become attenuated to maintain movement  
219 stability and filter out irrelevant or self-generated signals. Indeed, multiple studies have  
220 shown that both somatosensation and somatosensory-evoked potentials in S1 decrease  
221 during voluntary movement (50–53). Alternatively, sensory processing of the expected salient  
222 signals could be enhanced to improve movement execution and adaptation.

223 Very recently, a human electrocorticography (ECoG) study suggested a possible role for  
224 S1 in cognitive-motor imagery (54). The authors recorded neural activity from S1 while a  
225 tetraplegic participant imagined reaching movements and found that S1 neurons encoded  
226 movement direction during motor imagery in the absence of actual sensations. While the  
227 authors raise the concern that their results may be unique to individuals who have lost their  
228 main peripheral input, our finding of encoding of movement-related information in S1 before  
229 the onset of a movement suggests that movement-specific information in S1 without actual

230 movement is a general phenomenon in the intact human motor system. Our findings are also  
231 consistent with a second recent ECoG study in non-human primates (55). During a delayed  
232 reaching and grasping task, the authors showed movement-specific information in the ECoG  
233 signals from S1 well before movement initiation, and only slightly later than in M1. Together,  
234 these results suggest that the somatosensory system not only passively receives signals from  
235 the external world but also actively processes them via interactions with anticipatory  
236 information from the motor system.

237 One may wonder why such movement-specific encoding in S1 during planning has not  
238 been reported in previous human fMRI studies. One contributing reason may be that we had  
239 higher sensitivity to detect these signals than previous studies, as we used finger rather than  
240 arm movements (the former having more distinct cortical representation in S1), higher field  
241 strength (7T) and spatial resolution, and a more sensitive multivariate analysis method  
242 (crossnobis dissimilarity vs. pattern classification, Walther et al., 2016).

243 Our second main finding – the close correspondence between finger-specific activity  
244 patterns across planning and execution – appears to be at odds with the idea that these two  
245 processes occupy orthogonal neural subspaces to avoid overt movement during planning  
246 (42, 56). We think that there are at least two possible explanations for this. First, the  
247 divergence of results could be caused by the difference between spatially directed arm  
248 movements and non-spatial finger movements. If for single finger movements even single-  
249 neuron activity patterns are highly correlated between planning and execution, then overt  
250 movement during planning would need to be actively suppressed, for example through the  
251 deactivation that we observed around the central sulcus. An alternative and perhaps more  
252 likely explanation of the discrepancy lies in the different measurement modalities. While the  
253 orthogonality was observed in electrophysiological recordings of individual neurons, the fMRI  
254 measurements we employed here mainly reflect excitatory postsynaptic potentials (57) and  
255 average metabolic activity across hundreds of thousands of cortical neurons. Thus, it is  
256 possible that planning pre-activates the specific cortical columns in M1 and S1 that are also  
257 most active during movement of that finger. Within each of these cortical micro-circuits,  
258 however, planning-related activity could still be orthogonal to the activity observed during  
259 execution at the single neuron level (e.g., see Arbuckle et al., 2020, for a similar observation  
260 for cortical representations of flexion and extension finger movements). This would suggest  
261 a new hypothesis for the architecture of the sensory-motor system where movement planning

262 pre-activates the movement-specific circuits in M1 and S1. However, it does so in a fashion  
263 that the induced planning-related activity is, in terms of the firing output of neurons,  
264 orthogonal to the patterns during movement execution.

265

## 266 **Methods**

### 267 *Participants*

268 Twenty-three right-handed neurologically healthy participants volunteered to take part in the  
269 experiment (13 F, 10 M; age 20–31 years, mean 23.43 years, SD 4.08 years). Criteria for  
270 inclusion were right-handedness and no prior history of psychiatric or neurological disorders.  
271 Handedness was assessed with the Edinburgh Handedness Inventory (mean 82.83, SD  
272 9.75). All experimental procedures were approved by the Research Ethics Committee at  
273 Western University. Participants provided written informed consent to procedures and data  
274 usage and received monetary compensation for their participation. One participant withdrew  
275 before study completion and was excluded from data analysis (final N = 22).

276

### 277 *Apparatus*

278 Repeated presses of right-hand finger movements were performed on a custom-made MRI-  
279 compatible keyboard device (Fig. 1A). The keys of the device did not move but force  
280 transducers underneath each key measured isometric force production at an update rate of  
281 2 ms (Honeywell FS series; dynamic range 0-25 N; sampling 200 Hz). A keypress/release  
282 was detected when the force crossed a threshold of 1 N. The forces measured from the  
283 keyboard were low-pass filtered to reduce noise induced by the MRI environment, amplified,  
284 and sent to PC for online task control and data recording.

285

### 286 *Task*

287 We used a task in which participants produced repeated keypresses with their right-hand  
288 fingers in response to numerical cues appearing on the screen (white outline, Fig. 1A). On  
289 each trial, a string of 6 numbers (instruction) instructed which fingers to plan (1 = thumb, 3 =  
290 middle, 5 = little). After a variable delay (4, 6, or 8 s randomly sampled from a geometric  
291 distribution with  $p = 0.5$ ; preparation phase, yellow background), participants received a  
292 color cue (go/no-go cue) indicating whether to perform the planned finger movements (blue

293 outline = go,  $p = 0.6$ ), or not (orange outline = no-go,  $p = 0.4$ ). The role of no-go trials was to  
294 de-couple the hemodynamic response to the successive planning and execution events. To  
295 encourage planning during the delay period, at the go/no-go cue the digits were masked  
296 with asterisks, and participants had to perform the movements from memory (movement  
297 phase, green background). Participants had 2.5 seconds to complete the movement phase,  
298 and a vanishing white bar under the asterisks indicated how much time was left to complete  
299 all of the keypresses. To limit and monitor unwanted movements during the preparation  
300 phase, we required participants to pre-activate their fingers by maintaining a steady force of  
301 around 0.2-0.3 N on all of the keys during the Preparation phase. As a visual aid, we  
302 displayed a red area (between 0 and 0.5 N) and asked participants to remain within the  
303 middle of that range with all the fingers (touching either boundary of the red area would incur  
304 an error, counting as unwanted movement). In the case of a no-go trial, participants were  
305 instructed to remain as still as possible maintaining the finger pre-activation until the end of  
306 the movement phase (i.e., releasing any of the keys would incur an error). During the  
307 movement phase participants also received online feedback on the correctness of each  
308 press with asterisks turning either green, for a correct press, or red, for incorrect presses.  
309 After the movement phase, participants received points based on their performance (reward  
310 phase, 0.5 s, purple background). Participants were instructed to perform the movements as  
311 accurately as possible. As long as they remained within task constraints (i.e., 6 keypresses  
312 in less than 2.5 seconds), an exact movement speed was not enforced. On a trial-by-trial  
313 basis, during the reward phase participants received points for their performance according  
314 to the following scheme: -1 point in case of no-go error or go cue anticipation (timing errors);  
315 0 points for pressing any wrong key (press error); 1 point in case of a correct no-go trial; and  
316 2 points in case of a correct go trial. Inter-trial-intervals (ITIs) varied between 1 and 16  
317 seconds within the domain  $ITI = \{1, 2, 4, 8, 16\}$ . To reduce the overlap in brain responses  
318 from one trial to the next, actual ITIs were randomly picked from a geometric distribution with  
319  $p = 0.5$ . This meant a higher probability of shorter intervals (1 and 2 s) and occasional very  
320 long intervals (8 and 16 s). The design was optimized to minimize the variance inflation factor  
321 (VIF):

$$VIF = \text{var}(E) / \text{var}(X),$$

323



324 the ratio of the mean estimation variance of all the regression weights (planning- and  
325 execution-related regressors for each finger), and the mean estimation variance had these  
326 regressors been estimated in isolation. For our design, the average VIF was quite low, on  
327 average between 1 and 1.2, indicating that we could separate planning and execution  
328 related activity without a large loss of experimental power.

329

### 330 *Design*

331 Participants underwent one fMRI session consisting of 10 functional runs and 1 anatomical  
332 scan. In an event-related design, we randomly interleaved 3 types of repeated single finger  
333 movements involving the thumb (1), the middle (3), and the little (5) fingers (e.g., 111111 for  
334 thumb movement, Fig. 1A) and 3 types of multi finger sequences (e.g., 135315). The day  
335 before the fMRI scan, participants familiarized themselves with the experimental apparatus  
336 and the go/no-go paradigm in a short behavioral session of practice outside the scanner (5  
337 blocks, about 15-30 min in total). For the behavioral practice, inter-trial intervals were kept to  
338 a fixed 1 s to speed up the task, and participants were presented with different sequences  
339 from what they would see while in the scanner. These 6-item sequences were randomly  
340 selected from a pool of all possible permutations of the numbers 1, 3, and 5, with the  
341 exclusion of sequences that contained consecutive repetitions of the same number. Given  
342 that the current paper is concerned with the relationship between representations of simple  
343 planning and execution, here we will focus only on the results for single finger movements.  
344 The results for multi finger sequences will be reported in a future paper. Each single finger  
345 trial type (e.g., 111111) was repeated 5 times (2 no-go and 3 go trials), totalling 30 trials per  
346 functional run. Two periods of 10 s rests were added at the beginning and at the end of each  
347 functional run to allow for signal relaxation and provide a better estimate of baseline  
348 activation. Each functional run took about 5.5 minutes and the entire scanning session  
349 (including the anatomical scan and setup time) lasted for about 75 minutes.

350

### 351 *Imaging data acquisition*

352 High-field functional magnetic resonance imaging (fMRI) data were acquired on a 7T  
353 Siemens Magnetom scanner with a 32-channel head coil at Western University (London  
354 Ontario, Canada). The anatomical T1-weighted scan of each participant was acquired  
355 halfway through the scanning session (after the first 5 functional runs) using a Magnetization-

356 Prepared Rapid Gradient Echo sequence (MPRAGE) with voxel size of 0.75x0.75x0.75 mm  
357 isotropic (field of view = 208 x 157 x 110 mm [A-P; R-L; F-H], encoding direction coronal). To  
358 measure the blood-oxygen-level dependent (BOLD) responses in human participants, each  
359 functional scan (330 volumes) used the following sequence parameters: GRAPPA 3, multi-  
360 band acceleration factor 2, repetition time [TR] = 1.0 s, echo time [TE] = 20 ms, flip angle  
361 [FA] = 30 deg, slice number: 44, voxel size: 2x2x2 mm isotropic. To estimate and correct for  
362 magnetic field inhomogeneities, we also acquired a gradient echo field map with the following  
363 parameters: transversal orientation, field of view: 210 x 210 x 160 mm, 64 slices, 2.5 mm  
364 thickness, TR = 475 ms, TE = 4.08 ms, FA = 35 deg.

365

### 366 *Preprocessing and univariate analysis*

367 Preprocessing of the functional data was performed using SPM12 ([fil.ion.ucl.ac.uk/spm](http://fil.ion.ucl.ac.uk/spm)) and  
368 custom MATLAB code. This included correction for geometric distortions using the gradient  
369 echo field map (58), and motion realignment to the first scan in the first run (3 translations: x,  
370 y, z; 3 rotations: pitch, roll yaw). Due to the short TR, no slice timing corrections were applied.  
371 The functional data were co-registered to the anatomical scan, but no normalization to a  
372 standard template or smoothing was applied. To allow magnetization to reach equilibrium,  
373 the first four volumes of each functional run were discarded. The pre-processed images were  
374 analyzed with a general linear model (GLM). We defined separate regressors for each  
375 combination of the 6 finger movements (single, multi) x 2 phases (preparation, movement).  
376 To control for the effect of potential spill-over of movement execution activity on the preceding  
377 planning activity, we also estimated a separate GLM with separate regressors for the  
378 preparation phases of go and no-go trials, resulting in a total of 18 regressors (12 go + 6 no-  
379 go), plus the intercept, for each run. Each regressor consisted of a boxcar function (on for 2  
380 s of each phase duration and off otherwise) convolved with a two-gamma canonical  
381 hemodynamic response function with a peak onset at 5 s and a post-stimulus undershoot  
382 minimum at 10 s (Fig. 1B). Given the relatively low error rates (single:  $8.51 \pm 1.52$  %, multi:  
383  $17.21 \pm 3.38$  %; timing errors, single:  $7.58 \pm 0.62$  %, multi:  $10.23 \pm 0.85$  %; press errors,  
384 single:  $1.18 \pm 0.26$  %, multi:  $9.04 \pm 1.03$  %), all trials were included to estimate the regression  
385 coefficients, regardless of whether the execution was correct or erroneous. Ultimately, the  
386 first-level analysis resulted in activation images (beta maps) for each of the 18 conditions per  
387 run, for each of the participants.

388

389 *Surface reconstruction and ROI definition*

390 Individual subject's cortical surfaces were reconstructed using Freesurfer (59). First, we  
391 extracted the white-gray matter and pial surfaces from each participant's anatomical image.  
392 Next, we inflated each surface into a sphere and aligned it using sulcal depth and curvature  
393 information to the Freesurfer average atlas (Fischl et al., 1999). Both hemispheres in each  
394 participant were then resampled into Workbench's 164k vertex grid. This allowed us to  
395 compare similar areas of the cortical surface in each participant by selecting the  
396 corresponding vertices on the group atlas. Anatomical regions of interest (ROIs) were  
397 defined using a probabilistic cytoarchitectonic atlas (61) projected onto the common group  
398 surface. Our main ROIs were defined bilaterally as follows: primary motor cortex (M1) was  
399 defined by including nodes with the highest probability of belonging to Brodmann area (BA)  
400 4 within 2 cm above and below the hand knob anatomical landmark (62); primary  
401 somatosensory cortex (S1) was defined by the nodes related to BA 1, 2 and 3; dorsal  
402 premotor cortex (PMd) was defined as the lateral part of the middle frontal gyrus; finally, the  
403 anterior part of the superior parietal lobule (aSPL) included areas anterior, superior and  
404 ventral to the intraparietal sulcus (IPS). ROI definition was carried out separately in each  
405 subject using FSL's subcortical segmentation. When resampling functional onto the surface,  
406 to avoid contamination between M1 and S1 activities, we excluded voxels with more than  
407 25% of their volume in the grey matter on the opposite side of the central sulcus.

408

409 *Multivariate distance analysis*

410 To detect single finger representations across the cortical surface, we used representational  
411 similarity analysis (RSA; Diedrichsen and Kriegeskorte, 2017; Walther et al., 2016) with a  
412 surface-based searchlight approach (64). For each node, we selected a region (the  
413 searchlight) corresponding to 100 voxels (12 mm disc radius) in the gray matter and  
414 computed cross-validated Mahalanobis (crossnobis, Walther et al., 2016) dissimilarities  
415 between pairs of evoked activity patterns (beta estimates from first level GLM) of single finger  
416 sequences, during both preparation and movement phases. Prior to calculating the  
417 dissimilarities, beta weights for each condition were spatially pre-whitened (i.e., weighted by  
418 the matrix square root of the noise covariance matrix, as estimated from the residuals of the  
419 GLM. The noise covariance matrix was slightly regularized towards a diagonal matrix (65).

420 Multivariate pre-whitening has been shown to increase the reliability of dissimilarity estimates  
421 (39). The resulting analyses (one RDM per participant containing the dissimilarities between  
422 the three single fingers during planning and execution: 6 conditions, 15 dissimilarity pairs)  
423 were then assigned to the central node and the searchlight was moved across all nodes  
424 across the surface sheet obtaining a cortical map (Fig. 2B-2D). Cross-validation ensures the  
425 distances estimates are unbiased, such that if two patterns differ only by measurement noise,  
426 the mean of the estimated value would be zero. This also means that estimates can  
427 sometimes become negative. Therefore, dissimilarities significantly larger than zero indicate  
428 that two patterns are reliably distinct, similar to an above-chance performance in a cross-  
429 validated pattern-classification analysis. Additionally, to the searchlight analysis, the  
430 multivariate analysis was conducted separately for each anatomically defined ROI (e.g., Fig.  
431 4A).

432

#### 433 *Correlation between behavioral and neural distances*

434 To ensure that our planning results were not contaminated by unwanted micro-movements  
435 during the preparation phase, we calculated the behavioral distance between sequences on  
436 the basis of keyboard force data and correlated behavioral and neural distances. For  
437 behavioral distances, we first extracted force data (2 ms temporal resolution, smoothed with  
438 a gaussian kernel of 9.42 full width at half maximum, FWHM) and binned it in 10 ms steps  
439 (down sampling largely due to memory constraints) for both the preparation and movement  
440 phases (Fig. 3A). Next, for each subject, we calculated the mean (5) and the standard  
441 deviation (5) of the time-averaged force of each finger for each condition (3 sequences x 2  
442 phases = 6) and block (10). These subject-specific finger force patterns (60 x 10) were  
443 multivariately pre-whitened using their covariance matrix. Finally, we calculated the cross-  
444 validated squared Euclidean distances for each condition (6 x 6 RDM) and averaged  
445 distances between the 3 finger movements for each phase (preparation, movement). These  
446 mean finger force distances for each subject were correlated with the mean voxel activity  
447 distances from the two phases for 2 ROIs (M1 and S1, Fig. 3C-3D).

448

#### 449 *Pattern component modelling correlation models*

450 We used pattern component modelling (PCM) to quantify the correspondence of sequence-  
451 specific activity patterns across planning and execution (43). This method has been shown

452 to be advantageous in estimating correlations. In contrast to simple Pearson's or cross-  
453 validated correlation estimated from raw activity patterns, PCM separately models the noise  
454 and signal components. We created 100 correlation models with correlations in the range [0–  
455 1] in equal step sizes and assessed the likelihood of the observed data from each participant  
456 under each model. Fig. 4D shows average log-likelihoods for each model, relative to the  
457 mean log-likelihood across models. Differences between the log-likelihoods can be  
458 interpreted as log-Bayes factors. Group inferences were performed using a simple t-test on  
459 log-likelihoods. To compare each model to the best fitting model, we had to correct for the  
460 bias arising from picking the best model and testing it on the same data: We used n-1  
461 subjects to determine the group winning model, and then chose the log-likelihood of this  
462 model for the left-out subject (for whom this model may not be the best one) as the likelihood  
463 for the “best” model. This was repeated across all subjects and a one-sided paired-sample  
464 *t*-test was performed on the recorded log-likelihood and every other model. This test revealed  
465 which of the correlation models were significantly worse (i.e., associated with a lower log-  
466 likelihood) than the winning model that was independently estimated via cross-validation.  
467

## 468 References

- 469 1. S. W. Keele, J. J. Summers, "The Structure of Motor Programs" in *Motor Control*,  
470 (Elsevier, 1976), pp. 109–142.
- 471 2. S. W. Keele, Movement control in skilled motor performance. *Psychological Bulletin*  
472 **70**, 387–403 (1968).
- 473 3. D. A. Rosenbaum, Human movement initiation: Specification of arm, direction, and  
474 extent. *Journal of Experimental Psychology: General* **109**, 444–474 (1980).
- 475 4. S. T. Klapp, Motor Response Programming During Simple and Choice Reaction  
476 Time: The Role of Practice. *Journal of Experimental Psychology: Human Perception*  
477 *and Performance* **21**, 1015–1027 (1995).
- 478 5. S. T. Klapp, C. I. Erwin, Relation between programming time and duration of the  
479 response being programmed. *Journal of Experimental Psychology: Human*  
480 *Perception and Performance* **2**, 591–598 (1976).
- 481 6. A. M. Haith, J. Pakpoor, J. W. Krakauer, Independence of Movement Preparation and  
482 Movement Initiation. *Journal of Neuroscience* **36**, 3007–3015 (2016).
- 483 7. G. Ariani, J. Diedrichsen, Sequence learning is driven by improvements in motor  
484 planning. *Journal of Neurophysiology* **121**, 2088–2100 (2019).
- 485 8. A. L. Wong, A. M. Haith, Motor planning flexibly optimizes performance under  
486 uncertainty about task goals. *Nature Communications* **8**, 14624 (2017).
- 487 9. R. M. Hardwick, A. D. Forrence, J. W. Krakauer, A. M. Haith, Time-dependent  
488 competition between goal-directed and habitual response preparation. *Nature*  
489 *Human Behaviour* **3**, 1252–1262 (2019).
- 490 10. C. Ghez, *et al.*, Discrete and continuous planning of hand movements and isometric  
491 force trajectories. *Experimental Brain Research* **115**, 217–233 (1997).
- 492 11. P. Cisek, J. F. Kalaska, Neural correlates of mental rehearsal in dorsal premotor  
493 cortex. *Nature* **431**, 993–6 (2004).
- 494 12. P. Cisek, J. F. Kalaska, Neural mechanisms for interacting with a world full of action  
495 choices. *Annual review of neuroscience* **33**, 269–298 (2010).
- 496 13. E. Hoshi, J. Tanji, Differential involvement of neurons in the dorsal and ventral  
497 premotor cortex during processing of visual signals for action planning. *Journal of*  
498 *neurophysiology* **95**, 3596–616 (2006).

- 499 14. E. Hoshi, J. Tanji, Differential roles of neuronal activity in the supplementary and  
500 presupplementary motor areas: from information retrieval to motor planning and  
501 execution. *Journal of neurophysiology* **92**, 3482–99 (2004).
- 502 15. R. A. Andersen, H. Cui, Intention, Action Planning, and Decision Making in Parietal-  
503 Frontal Circuits. *Neuron* **63**, 568–83 (2009).
- 504 16. H. Cui, R. A. Andersen, Posterior Parietal Cortex Encodes Autonomously Selected  
505 Motor Plans. *Neuron* **56**, 552–559 (2007).
- 506 17. H. Cui, R. A. Andersen, Different Representations of Potential and Selected Motor  
507 Plans by Distinct Parietal Areas. *Journal of Neuroscience* **31**, 18130–18136 (2011).
- 508 18. J. P. Gallivan, D. A. McLean, K. F. Valyear, C. E. Pettypiece, J. C. Culham, Decoding  
509 Action Intentions from Preparatory Brain Activity in Human Parieto-Frontal Networks.  
510 *Journal of Neuroscience* **31**, 9599–9610 (2011).
- 511 19. G. Ariani, M. F. Wurm, A. Lingnau, Decoding Internally and Externally Driven  
512 Movement Plans. *Journal of Neuroscience* **35**, 14160–14171 (2015).
- 513 20. J. P. Gallivan, I. S. Johnsrude, J. R. Flanagan, Planning Ahead: Object-Directed  
514 Sequential Actions Decoded from Human Frontoparietal and Occipitotemporal  
515 Networks. *Cerebral Cortex* **26**, bhu302 (2015).
- 516 21. J. P. Gallivan, D. A. McLean, F. W. Smith, J. C. Culham, Decoding Effector-  
517 Dependent and Effector-Independent Movement Intentions from Human Parieto-  
518 Frontal Brain Activity. *Journal of Neuroscience* **31**, 17149–17168 (2011).
- 519 22. J. P. Gallivan, D. A. McLean, J. R. Flanagan, J. C. Culham, Where One Hand Meets  
520 the Other: Limb-Specific and Action-Dependent Movement Plans Decoded from  
521 Preparatory Signals in Single Human Frontoparietal Brain Areas. *Journal of*  
522 *Neuroscience* **33**, 1991–2008 (2013).
- 523 23. L. Turella, *et al.*, Beta band modulations underlie action representations for  
524 movement planning. *NeuroImage* **136**, 197–207 (2016).
- 525 24. F. T. M. Leoné, T. Heed, I. Toni, W. P. Medendorp, Understanding effector selectivity  
526 in human posterior parietal cortex by combining information patterns and activation  
527 measures. *The Journal of neuroscience* **34**, 7102–12 (2014).
- 528 25. S. Vyas, M. D. Golub, D. Sussillo, K. V. Shenoy, Computation Through Neural  
529 Population Dynamics. *Annual Review of Neuroscience* **43**, 249–275 (2020).
- 530 26. M. M. Churchland, J. P. Cunningham, M. T. Kaufman, S. I. Ryu, K. V. Shenoy,

- 531 Cortical Preparatory Activity: Representation of Movement or First Cog in a  
532 Dynamical Machine? *Neuron* **68**, 387–400 (2010).
- 533 27. K. V Shenoy, M. Sahani, M. M. Churchland, Cortical control of arm movements: a  
534 dynamical systems perspective. *Annual Review of Neuroscience* **36**, 337–359  
535 (2013).
- 536 28. N. Ejaz, M. Hamada, J. Diedrichsen, Hand use predicts the structure of  
537 representations in sensorimotor cortex. *Nature Neuroscience* **18**, 1034–1040 (2015).
- 538 29. A. Yokoi, S. A. Arbuckle, J. Diedrichsen, The role of human primary motor cortex in  
539 the production of skilled finger sequences. *Journal of Neuroscience* **38**, 1430–1442  
540 (2018).
- 541 30. J. Diedrichsen, T. Wiestler, J. W. Krakauer, Two distinct ipsilateral cortical  
542 representations for individuated finger movements. *Cerebral Cortex* **23**, 1362–1377  
543 (2013).
- 544 31. T. Wiestler, S. Waters-Metenier, J. Diedrichsen, Effector-independent motor  
545 sequence representations exist in extrinsic and intrinsic reference frames. *Journal of*  
546 *Neuroscience* **34**, 5054–5064 (2014).
- 547 32. A. Yokoi, J. Diedrichsen, Neural Organization of Hierarchical Motor Sequence  
548 Representations in the Human Neocortex. *Neuron*, 1–13 (2019).
- 549 33. S. A. Arbuckle, *et al.*, Structure of population activity in primary motor cortex for  
550 single finger flexion and extension. *The Journal of Neuroscience*, JN-RM-0999-20  
551 (2020).
- 552 34. S. A. Arbuckle, A. Yokoi, J. A. Pruszynski, J. Diedrichsen, Stability of representational  
553 geometry across a wide range of fMRI activity levels. *NeuroImage* **186**, 155–163  
554 (2019).
- 555 35. L. Huber, *et al.*, Sub-millimeter fMRI reveals multiple topographical digit  
556 representations that form action maps in human motor cortex. *NeuroImage* **208**,  
557 116463 (2020).
- 558 36. G. Ariani, N. N. Oosterhof, A. Lingnau, Time-resolved decoding of planned delayed  
559 and immediate prehension movements. *Cortex* **99** (2018).
- 560 37. J. Tanji, E. V. Evarts, Anticipatory activity of motor cortex neurons in relation to  
561 direction of an intended movement. *Journal of Neurophysiology* **39**, 1062–1068  
562 (1976).



- 563 38. D. J. Crammond, J. F. Kalaska, Prior information in motor and premotor cortex:  
564 activity during the delay period and effect on pre-movement activity. *Journal of*  
565 *neurophysiology* **84**, 986–1005 (2000).
- 566 39. A. Walther, *et al.*, Reliability of dissimilarity measures for multi-voxel pattern analysis.  
567 *NeuroImage* **137**, 188–200 (2016).
- 568 40. J. Diedrichsen, *et al.*, Comparing representational geometries using whitened  
569 unbiased-distance-matrix similarity (2020).
- 570 41. N. N. Oosterhof, *et al.*, Surface-Based Information Mapping Reveals Crossmodal  
571 Vision – Action Representations in Human Parietal and Occipitotemporal Cortex  
572 Surface-Based Information Mapping Reveals Crossmodal Vision – Action  
573 Representations in Human Parietal and Occipitotemporal. *Journal of neurophysiology*  
574 **104**, 1077–89 (2012).
- 575 42. M. T. Kaufman, M. M. Churchland, S. I. Ryu, K. V Shenoy, Cortical activity in the null  
576 space: permitting preparation without movement. *Nature Neuroscience* **17**, 440–448  
577 (2014).
- 578 43. J. Diedrichsen, A. Yokoi, S. A. Arbuckle, Pattern component modeling: A flexible  
579 approach for understanding the representational structure of brain activity patterns.  
580 *NeuroImage* **180**, 119–133 (2018).
- 581 44. G. E. Alexander, M. D. Crutcher, Neural representations of the target (goal) of  
582 visually guided arm movements in three motor areas of the monkey. *Journal of*  
583 *Neurophysiology* **64**, 164–178 (1990).
- 584 45. A. Riehle, J. Requin, Monkey primary motor and premotor cortex: single-cell activity  
585 related to prior information about direction and extent of an intended movement.  
586 *Journal of neurophysiology* **61**, 534–49 (1989).
- 587 46. J. D. Coulter, E. G. Jones, Differential distribution of corticospinal projections from  
588 individual cytoarchitectonic fields in the monkey. *Brain Research* **129**, 335–340  
589 (1977).
- 590 47. J.-A. Rathelot, P. L. Strick, Muscle representation in the macaque motor cortex: An  
591 anatomical perspective. *Proceedings of the National Academy of Sciences* **103**,  
592 8257 LP – 8262 (2006).
- 593 48. G. L. Widener, P. D. Cheney, Effects on Muscle Activity From Microstimuli Applied to  
594 Somatosensory and Motor Cortex During Voluntary Movement in the Monkey. *Journal*

- 595            *of Neurophysiology* **77**, 2446–2465 (1997).
- 596    49.    E. Azim, K. Seki, Gain control in the sensorimotor system. *Current Opinion in*  
597            *Physiology* **8**, 177–187 (2019).
- 598    50.    A. Starr, L. G. Cohen, ‘Gating’ of somatosensory evoked potentials begins before the  
599            onset of voluntary movement in man. *Brain Research* **348**, 183–186 (1985).
- 600    51.    C. E. Chapman, M. C. Bushnell, D. Miron, G. H. Duncan, J. P. Lund, Sensory  
601            perception during movement in man. *Experimental brain research* **68**, 516–524  
602            (1987).
- 603    52.    W. Jiang, Y. Lamarre, C. E. Chapman, Modulation of cutaneous cortical evoked  
604            potentials during isometric and isotonic contractions in the monkey. *Brain Research*  
605            **536**, 69–78 (1990).
- 606    53.    K. Seki, E. E. Fetz, Gating of sensory input at spinal and cortical levels during  
607            preparation and execution of voluntary movement. *Journal of Neuroscience* **32**, 890–  
608            902 (2012).
- 609    54.    M. Jafari, *et al.*, The human primary somatosensory cortex encodes imagined  
610            movement in the absence of sensory information. *Communications biology* **3**, 1–7  
611            (2020).
- 612    55.    T. Umeda, T. Isa, Y. Nishimura, The somatosensory cortex receives information about  
613            motor output. *Science Advances* **5** (2019).
- 614    56.    G. F. Elsayed, A. H. Lara, M. T. Kaufman, M. M. Churchland, J. P. Cunningham,  
615            Reorganization between preparatory and movement population responses in motor  
616            cortex. *Nature Communications*, 13239 (2016).
- 617    57.    N. K. Logothetis, J. Pauls, M. Augath, T. Trinath, A. Oeltermann, Neurophysiological  
618            investigation of the basis of the fMRI signal. *Nature* **412**, 150–7 (2001).
- 619    58.    C. Hutton, *et al.*, Image Distortion Correction in fMRI: A Quantitative Evaluation.  
620            *NeuroImage* **16**, 217–240 (2002).
- 621    59.    A. M. Dale, B. Fischl, M. I. Sereno, Cortical Surface-Based Analysis: I. Segmentation  
622            and Surface Reconstruction. *NeuroImage* **9**, 179–194 (1999).
- 623    60.    B. Fischl, M. I. Sereno, R. B. H. Tootell, A. M. Dale, High-resolution intersubject  
624            averaging and a coordinate system for the cortical surface. *Human Brain Mapping* **8**,  
625            272–284 (1999).
- 626    61.    B. Fischl, *et al.*, Cortical folding patterns and predicting cytoarchitecture. *Cerebral*

- 627            *Cortex* **18**, 1973–1980 (2008).
- 628    62.    T. Yousry, Localization of the motor hand area to a knob on the precentral gyrus. A  
629            new landmark. *Brain* **120**, 141–157 (1997).
- 630    63.    J. Diedrichsen, N. Kriegeskorte, Representational models: A common framework for  
631            understanding encoding, pattern-component, and representational-similarity  
632            analysis. *PLOS Computational Biology* **13**, e1005508 (2017).
- 633    64.    N. N. Oosterhof, T. Wiestler, P. E. Downing, J. Diedrichsen, A comparison of volume-  
634            based and surface-based multi-voxel pattern analysis. *NeuroImage* **56**, 593–600  
635            (2011).
- 636    65.    O. Ledoit, M. Wolf, Honey, I shrunk the sample covariance matrix. *The Journal of*  
637            *Portfolio Management* **30**, 110–119 (2004).
- 638

639 Supplementary figures

640

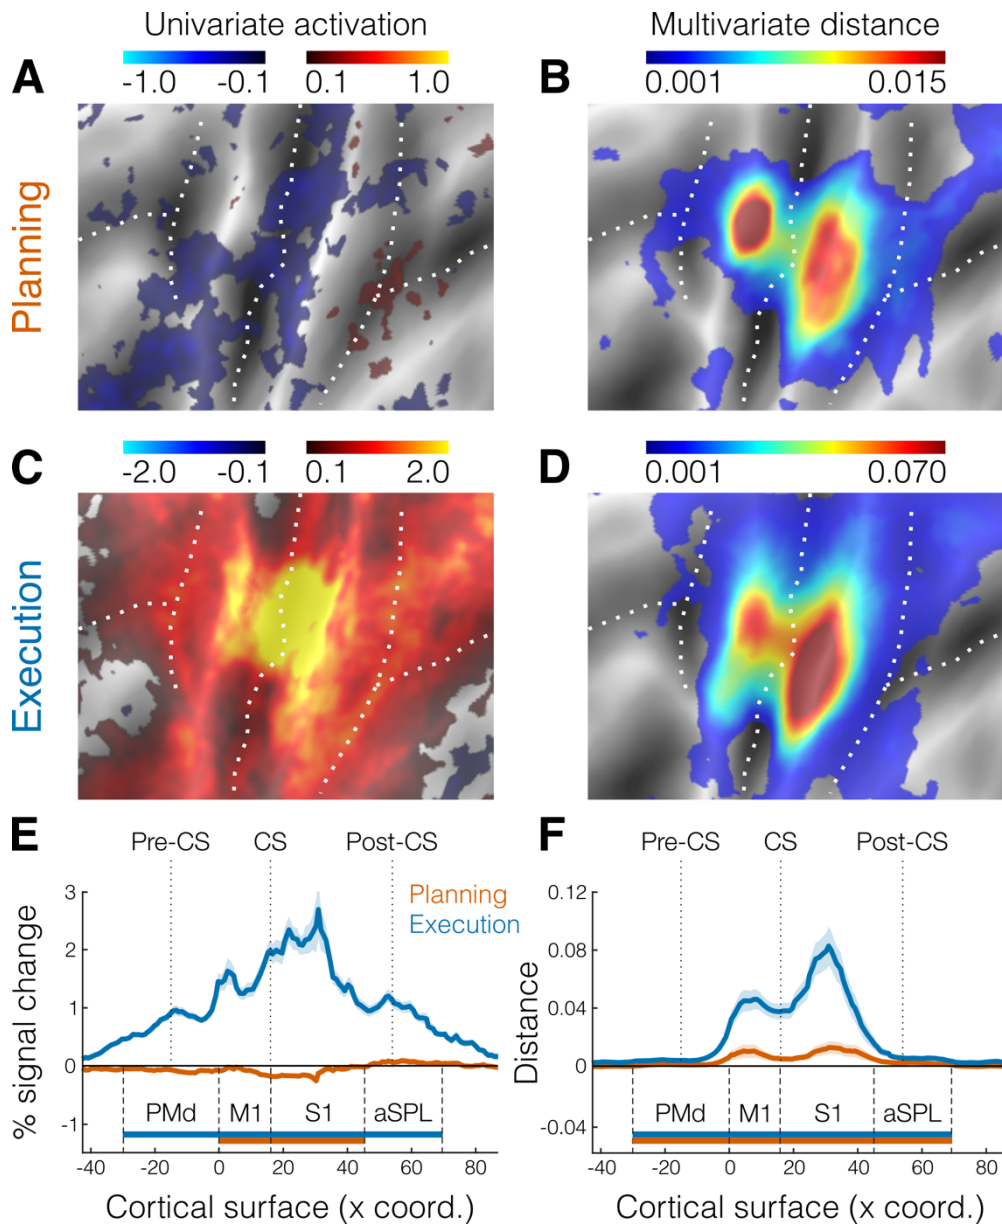

**Figure S1 | Activation and distance analyses using planning of both go and no-go trials.** **A.** Activation map (percent signal change) for the contrast planning>baseline. The selected area of interest is the same as shown in purple in the inset of Fig. 2A. **B.** Crossnobis distance searchlight map for movement planning. **C.** Same as A, but for the contrast execution>baseline. **D.** Same as B, but for movement execution. **E-F.** Cross-section analysis corresponding to the same area shown in white in the inset of Fig. 2A. **E.** Mean percent signal change ( $\pm$  SEM) during planning (orange) and execution (blue). **F.** mean crossnobis distance ( $\pm$  SEM). Horizontal bars indicate significance ( $p < 0.05$ ) in a 2-sided one-sample  $t$ -test against zero. All other figure conventions are the same as in Fig. 2.

641
